# Supplementary material for: Effects of auxin (indole-3-butyric acid) on growth characteristics, lignification, and expression profiles of genes involved in lignin biosynthesis in carrot taproot
Source: PeerJ. 2020 Dec 8;8:e10492. doi: 10.7717/peerj.10492 (PMC7731654; doi:10.7717/peerj.10492)
Supplement: Supplemental Information 1 [file peerj-08-10492-s001.xlsx]

## Sheet: Sheet1
Raw data 1: Morphological characteristics.
Treatments	Replicates	Plant length	Shoot length	Number of petioles	Root length	Root diameter	Shoot fresh weight	Root fresh weight
		(cm)	(cm)		(cm)	(mm)	(g)	(g)
CK	1	59	47	7	12	12.6	10.23	10.06
	2	62	50	7	10	11.6	9.5	10.45
	3	59	46	6	13	10.85	8.79	11.19
	4	58	48	6	12	12.05	10.19	8.79
	5	58	47	6	11	12.5	9.68	11.58
50 µM	1	64.95	50.5	7	14.45	15.51	10	13.42
	2	69	53	7	16	17.15	10.16	15.95
	3	65.5	51	7	14.5	15.7	13.07	15.12
	4	67	52	6	15	15.41	12.36	14.35
	5	65.6	51	6	14.6	15.58	10.59	13.69
100 µM	1	75	58	7	17	17.22	13.75	16.56
	2	71.7	54.5	8	17.2	16.41	12.37	17.32
	3	69.8	54	6	15.8	15.4	12.91	15.97
	4	73.7	57	7	16.7	16.4	12.89	16.96
	5	70.8	55	6	15.8	17.6	12.27	13.19
150 µM	1	75	61	7	14	13.97	15.56	13.65
	2	71.1	57	7	14.1	14.86	15.07	12.09
	3	75	61	8	14	14.8	17.23	15
	4	76	61	7	15	14.6	15.04	14.86
	5	72.2	57.5	6	14.7	15.99	14.61	13.29
Raw data 2: Absorbance value for lignin determination.
Treatments	CK			50 µM			100 µM			150 µM
Replicates	1	2	3	1	2	3	1	2	3	1	2	3
OD280	0.372	0.381	0.402	0.339	0.326	0.325	0.299	0.302	0.337	0.385	0.371	0.401
Sample weight (mg)	5.5	5.5	5.5	11.1	11.1	11.1	9.5	9.5	9.5	9	9	9
Raw data 3: Cycle threshold values of candidate genes in RT-qPCR analysis.
Treatments	CK			50 µM			100 µM			150 µM
Replicates	1	2	3	1	2	3	1	2	3	1	2	3
DcPAL	27.2026	27.2413	27.0923	27.7184	27.7205	27.7146	27.9875	28.0357	27.714	27.7159	27.7947	27.8379
Dc4CL	28.9231	28.8821	28.882	29.903	29.7135	29.747	29.2496	29.1791	29.3859	28.8984	29.0638	29.2204
DcF5H	28.8628	28.938	28.8047	29.2869	29.2809	29.3116	29.7451	29.6671	29.8541	29.5686	29.466	29.6081
DcC4H	25.7345	25.5946	25.7844	26.2319	26.1465	26.2434	26.9001	26.9076	26.7885	26.1918	26.0495	26.2152
DcC3’H	28.2915	28.4664	28.3715	29.1413	28.8489	28.6541	29.3864	29.2413	29.2816	29.1359	29.191	29.3501
DcCOMT	26.6135	26.4555	26.4349	27.4547	27.7494	27.6484	27.7968	27.5861	27.6733	27.1537	27.1888	27.3449
DcHCT	29.0978	29.0999	29.1509	29.3981	29.4546	29.3412	28.5803	28.6263	28.4916	29.3987	29.3015	29.3058
DcCAD	30.1777	30.1051	29.9936	30.144	29.9082	30.0703	31.5783	31.6172	31.3998	30.1232	30.0709	30.488
DcCCoAOMT	26.1306	26.0033	25.8674	26.2788	26.572	26.3084	27.1051	27.2332	27.198	26.1846	26.2094	26.2927
DcCCR	28.7071	28.5737	28.5502	28.4153	28.3598	28.4278	28.6568	28.7846	28.6155	28.7098	28.7531	28.7392
DcLAC1	25.1879	25.0764	25.152	26.0993	25.9835	25.9857	26.5984	26.7458	26.6344	26.0196	26.082	26.2592
DcLAC2	30.1019	30.0261	29.9839	29.1256	29.0052	28.8837	30.4001	30.3116	30.1027	29.437	29.4111	29.7007
DcPER1	29.5511	29.5875	29.3385	29.2589	29.3753	29.5913	30.2693	30.5167	30.3419	30.0879	29.8873	29.8507
DcActin	20.8953	20.8469	20.6907	20.8965	20.9726	20.9605	21.0284	21.0058	20.9782	21.0446	21.0353	21.0932
